# Supplementary material
Source: MDPI journal article supplement (https://www.mdpi.com/1996-1073/15/22/8622)
Supplement: s1 [file s1]

Supplementary Table S1

General specifications of the model FSRU.

| Item                                       | Value                                                                             |
|--------------------------------------------|-----------------------------------------------------------------------------------|
| Type of LNG storage tanks                  | MARK III, maximum vapour pressure of 0.7 bar(g) and boil off rate (BOR) of 0.15 % |
| Cargo capacity                             | 170 000 m <sup>3</sup>                                                            |
| Type of LD compressor                      | 2 stage centrifugal compressor with pre-cooling                                   |
| Maximum / baseload regasification capacity | 750 mmscfd / 500 mmscfd                                                           |
| Propulsion system                          | Dual fuel diesel electric (DFDE)                                                  |
| Engines                                    | 3 x Wärtsilä 12V50DF (11.4 MW)<br>1 x Wärtsilä 6L50DF (5.7 MW)                    |

Supplementary Table S2

NG composition measured on board an FSRU.

| Component                                     | Mole fraction |
|-----------------------------------------------|---------------|
| Methane (CH <sub>4</sub> )                    | 0.89018       |
| Nitrogen (N <sub>2</sub> )                    | 0.00007       |
| Carbon dioxide (CO <sub>2</sub> )             | 0.00000       |
| Ethane (C <sub>2</sub> H <sub>6</sub> )       | 0.07974       |
| Propane (C <sub>3</sub> H <sub>8</sub> )      | 0.02291       |
| i-Butane (i-C <sub>4</sub> H <sub>10</sub> )  | 0.00322       |
| n-Butane (n-C <sub>4</sub> H <sub>10</sub> )  | 0.00371       |
| i-Pentane (i-C <sub>5</sub> H <sub>12</sub> ) | 0.00014       |
| n-Pentane (n-C <sub>5</sub> H <sub>12</sub> ) | 0.00002       |
| n-Hexane (n-C <sub>6</sub> H <sub>14</sub> )  | 0.00001       |

Supplementary Table S3

General parameters assumed for the regasification system.

| Parameter                                         | Value       |
|---------------------------------------------------|-------------|
| LNG tank pressure                                 | 1.16325 bar |
| BOG temperature from tank                         | -100 °C     |
| Regasified NG mass flow rate                      | 111.19 kg/s |
| Regasified NG pressure                            | 85 bar      |
| Regasified NG temperature                         | 10 °C       |
| Pumps and turbines isentropic efficiency          | 80 %        |
| Pumps and turbines electromechanical efficiency   | 90 %        |
| Feed pump discharge pressure                      | 9 bar       |
| LD isentropic efficiency                          | 55 %        |
| LD electromechanical efficiency                   | 80 %        |
| BOG temperature after the mixer                   | -120 °C     |
| LD discharge pressure                             | 6 bar       |
| Recondenser pressure                              | 5.5 bar     |
| Minimum temperature difference in heat exchangers | 5 °C        |
| Pressure drop in heat exchangers                  | 0.5 bar     |
| Condensation pressure                             | 1.5 bar     |
| LNG pressure drop through CD-1                    | 21 bar      |
| NG pressure drop through heat exchangers          | 2 bar       |
| Sea water inlet temperature                       | 15 °C       |
| Sea water outlet temperature                      | 10 °C       |
| Sea water inlet pressure                          | 1.01325 bar |
| Sea water pump discharge pressure                 | 7.5 bar     |

Supplementary Table S4

Effect of the LNG composition on the optimisation variables for each power cycle.

| Cycle   | 1 <sup>st</sup> stage<br>(C <sub>2</sub> H <sub>6</sub> mole fraction) |      | 2 <sup>nd</sup> stage<br>(C <sub>3</sub> H <sub>8</sub> mole fraction) |      | 3 <sup>rd</sup> stage<br>(n-C <sub>4</sub> H <sub>10</sub> mole fraction) |      | Open cycle flow rate (kg/s) |       |
|---------|------------------------------------------------------------------------|------|------------------------------------------------------------------------|------|---------------------------------------------------------------------------|------|-----------------------------|-------|
|         | Methane                                                                | LNG  | Methane                                                                | LNG  | Methane                                                                   | LNG  | Methane                     | LNG   |
| 1ORC    | 0.76                                                                   | 0.74 | -                                                                      | -    | -                                                                         | -    | -                           | -     |
| 1ORC-OC | 0.73                                                                   | 0.64 | -                                                                      | -    | -                                                                         | -    | 9.18                        | 19.08 |
| 2ORC    | 0.94                                                                   | 0.92 | 0.54                                                                   | 0.81 | -                                                                         | -    | -                           | -     |
| 2ORC-OC | 0.94                                                                   | 0.88 | 0.54                                                                   | 0.81 | -                                                                         | -    | 1.27                        | 13.83 |
| 3ORC    | 0.95                                                                   | 0.95 | 0.47                                                                   | 0.50 | 0.12                                                                      | 0.11 | -                           | -     |
| 3ORC-OC | 0.95                                                                   | 0.95 | 0.47                                                                   | 0.50 | 0.12                                                                      | 0.11 | 5.51                        | 5.51  |

Supplementary Table S5  
Thermodynamic data of the 2ORC-OC system.

| State | Quality<br>(-) | $T$<br>(°C) | $p$<br>(bar) | $h$<br>(kJ/kg) | $s$<br>(kJ/kg-K) | $e^{ph}$<br>(kJ/kg) | $\dot{m}$<br>(kg/s) |
|-------|----------------|-------------|--------------|----------------|------------------|---------------------|---------------------|
| 1     | 0.0000         | -159.89     | 1.16325      | -5573.11       | 4.8145           | 1071.14             | 110.44              |
| 2     | 0.0000         | -159.49     | 9.00         | -5570.79       | 4.8205           | 1071.68             | 110.44              |
| 3     | 0.0000         | -159.37     | 5.50         | -5570.79       | 4.8269           | 1069.75             | 110.44              |
| 4     | 0.0000         | -156.81     | 5.50         | -5561.79       | 4.9051           | 1055.43             | 120.27              |
| 5     | 0.0000         | -151.18     | 112.00       | -5529.85       | 4.9842           | 1063.79             | 120.27              |
| 6     | 0.0000         | -138.83     | 91.00        | -5489.49       | 5.3347           | 999.65              | 120.27              |
| 7     | 0.0000         | -159.89     | 1.16325      | -5573.11       | 4.8145           | 1071.14             | 0.05                |
| 8     | 0.0000         | -159.89     | 1.16325      | -5573.11       | 4.8145           | 1071.14             | 0.05                |
| 9     | 0.0000         | -159.89     | 1.16325      | -5573.11       | 4.8145           | 1071.14             | 0.00                |
| 10    | 1.0000         | -120.00     | 1.16325      | -4979.77       | 9.9474           | 134.10              | 0.00                |
| 11    | 1.0000         | -100.00     | 1.16325      | -4938.05       | 10.2034          | 99.48               | 0.70                |
| 12    | 1.0000         | -100.00     | 1.16325      | -4938.05       | 10.2034          | 99.48               | 0.70                |
| 13    | 1.0000         | -120.00     | 1.16325      | -4979.77       | 9.9474           | 134.11              | 0.75                |
| 14    | 0.0000         | -120.00     | 1.16325      | -5418.49       | 5.9764           | 879.33              | 0.00                |
| 15    | 1.0000         | -120.00     | 1.16325      | -4979.77       | 9.9474           | 134.10              | 0.75                |
| 16    | 1.0000         | 17.43       | 6.00         | -4692.66       | 10.4433          | 273.35              | 0.75                |
| 17    | 1.0000         | 17.43       | 6.00         | -4692.66       | 10.4433          | 273.35              | 0.75                |
| 18    | 1.0000         | 17.17       | 5.50         | -4692.66       | 10.4878          | 260.10              | 0.75                |
| 19    | 1.0000         | 17.43       | 6.00         | -4692.66       | 10.4433          | 273.35              | 0.00                |
| 20    | 1.0000         | 32.00       | 5.90         | -4659.37       | 10.5637          | 270.76              | 0.00                |
| 21    | 1.0000         | 32.00       | 5.90         | -4659.37       | 10.5637          | 270.76              | 0.00                |
| 22    | 1.0000         | 32.00       | 5.90         | -4659.37       | 10.5637          | 270.76              | 0.00                |
| 23    | 1.0000         | 10.00       | 85.00        | -4807.86       | 8.7622           | 659.37              | 9.08                |
| 24    | 1.0000         | -117.34     | 6.00         | -4989.16       | 9.0731           | 385.37              | 9.08                |
| 25    | 0.0000         | -146.18     | 5.50         | -5523.70       | 5.2183           | 1000.15             | 9.08                |
| 26    | 0.0000         | -71.62      | 89.00        | -5191.95       | 7.0994           | 771.03              | 120.27              |
| 27    | 1.0000         | -42.88      | 87.00        | -5002.55       | 7.9861           | 696.09              | 120.27              |
| 28    | 1.0000         | 10.00       | 85.00        | -4807.86       | 8.7622           | 659.37              | 120.27              |

Supplementary Table S5  
Thermodynamic data of the 2ORC-OC system.

| State | Quality<br>(-) | $T$<br>(°C) | $p$<br>(bar) | $h$<br>(kJ/kg) | $s$<br>(kJ/kg-K) | $e^{ph}$<br>(kJ/kg) | $\dot{m}$<br>(kg/s) |
|-------|----------------|-------------|--------------|----------------|------------------|---------------------|---------------------|
| 29    | 1.0000         | 10.00       | 85.00        | -4807.86       | 8.7622           | 659.37              | 111.19              |
| 30    | 0.0000         | -79.47      | 1.50         | -3408.02       | 3.0462           | 314.06              | 80.23               |
| 31    | 0.0000         | -78.06      | 25.24        | -3402.56       | 3.0535           | 317.33              | 80.23               |
| 32    | 1.0000         | 10.05       | 24.74        | -2861.80       | 5.1370           | 236.89              | 80.23               |
| 33    | 0.9119         | -66.62      | 2.00         | -2962.00       | 5.2586           | 100.43              | 80.23               |
| 34    | 0.0000         | -65.33      | 1.50         | -3109.10       | 2.1157           | 211.38              | 48.01               |
| 35    | 0.0000         | -64.80      | 10.61        | -3107.12       | 2.1181           | 212.64              | 48.01               |
| 36    | 1.0000         | 10.05       | 10.11        | -2570.51       | 4.1506           | 143.28              | 48.01               |
| 37    | 0.9763         | -37.88      | 2.00         | -2634.67       | 4.2188           | 58.79               | 48.01               |
| 38    | 0.0000         | 15.00       | 1.01325      | -15907.22      | 5.0369           | 0.72                | 4251.61             |
| 39    | 0.0000         | 15.05       | 7.50         | -15906.41      | 5.0375           | 1.36                | 4251.61             |
| 40    | 0.0000         | 15.05       | 7.50         | -15906.41      | 5.0375           | 1.36                | 1075.53             |
| 41    | 0.0000         | 10.00       | 1.01325      | -15928.18      | 4.9635           | 1.64                | 1075.53             |
| 42    | 0.0000         | 15.05       | 7.50         | -15906.41      | 5.0375           | 1.36                | 1183.38             |
| 43    | 0.0000         | 10.00       | 1.01325      | -15928.18      | 4.9635           | 1.64                | 1183.38             |
| 44    | 0.0000         | 15.05       | 7.50         | -15906.41      | 5.0375           | 1.36                | 1992.69             |
| 45    | 0.0000         | 10.00       | 1.01325      | -15928.18      | 4.9635           | 1.64                | 1992.69             |

Supplementary Table S6  
Thermodynamic data of the 3ORC-OC system.

| State | Quality<br>(-) | $T$<br>(°C) | $p$<br>(bar) | $h$<br>(kJ/kg) | $s$<br>(kJ/kg-K) | $e^{ph}$<br>(kJ/kg) | $\dot{m}$<br>(kg/s) |
|-------|----------------|-------------|--------------|----------------|------------------|---------------------|---------------------|
| 1     | 0.0000         | -159.89     | 1.16325      | -5573.11       | 4.8145           | 1071.14             | 110.44              |
| 2     | 0.0000         | -159.49     | 9.00         | -5570.79       | 4.8205           | 1071.68             | 110.44              |
| 3     | 0.0000         | -159.37     | 5.50         | -5570.79       | 4.8269           | 1069.75             | 110.44              |
| 4     | 0.0000         | -157.15     | 5.50         | -5563.00       | 4.8947           | 1057.32             | 116.70              |
| 5     | 0.0000         | -151.44     | 114.00       | -5530.50       | 4.9754           | 1065.77             | 116.70              |
| 6     | 0.0000         | -143.37     | 93.00        | -5505.20       | 5.2124           | 1020.41             | 116.70              |
| 7     | 0.0000         | -159.89     | 1.16325      | -5573.11       | 4.8145           | 1071.14             | 0.05                |
| 8     | 0.0000         | -159.89     | 1.16325      | -5573.11       | 4.8145           | 1071.14             | 0.05                |
| 9     | 0.0000         | -159.89     | 1.16325      | -5573.11       | 4.8145           | 1071.14             | 0.00                |
| 10    | 1.0000         | -120.00     | 1.16325      | -4979.77       | 9.9474           | 134.10              | 0.00                |
| 11    | 1.0000         | -100.00     | 1.16325      | -4938.05       | 10.2034          | 99.48               | 0.70                |
| 12    | 1.0000         | -100.00     | 1.16325      | -4938.05       | 10.2034          | 99.48               | 0.70                |
| 13    | 1.0000         | -120.00     | 1.16325      | -4979.77       | 9.9474           | 134.11              | 0.75                |
| 14    | 0.0000         | -120.00     | 1.16325      | -5418.49       | 5.9764           | 879.33              | 0.00                |
| 15    | 1.0000         | -120.00     | 1.16325      | -4979.77       | 9.9474           | 134.10              | 0.75                |
| 16    | 1.0000         | 17.43       | 6.00         | -4692.66       | 10.4433          | 273.35              | 0.75                |
| 17    | 1.0000         | 17.43       | 6.00         | -4692.66       | 10.4433          | 273.35              | 0.75                |
| 18    | 1.0000         | 17.17       | 5.50         | -4692.66       | 10.4878          | 260.10              | 0.75                |
| 19    | 1.0000         | 17.43       | 6.00         | -4692.66       | 10.4433          | 273.35              | 0.00                |
| 20    | 1.0000         | 32.00       | 5.90         | -4659.37       | 10.5637          | 270.76              | 0.00                |
| 21    | 1.0000         | 32.00       | 5.90         | -4659.37       | 10.5637          | 270.76              | 0.00                |
| 22    | 1.0000         | 32.00       | 5.90         | -4659.37       | 10.5637          | 270.76              | 0.00                |
| 23    | 1.0000         | 10.00       | 85.00        | -4807.86       | 8.7622           | 659.37              | 5.51                |
| 24    | 1.0000         | -117.34     | 6.00         | -4989.16       | 9.0731           | 385.37              | 5.51                |
| 25    | 0.0000         | -146.44     | 5.50         | -5524.67       | 5.2107           | 1001.45             | 5.51                |
| 26    | 0.0000         | -74.80      | 91.00        | -5213.64       | 6.9871           | 782.84              | 116.70              |
| 27    | 1.0000         | -46.32      | 89.00        | -5025.24       | 7.8801           | 704.99              | 116.70              |
| 28    | 1.0000         | -19.50      | 87.00        | -4906.23       | 8.3855           | 673.32              | 116.70              |

Supplementary Table S6  
Thermodynamic data of the 3ORC-OC system.

| State | Quality<br>(-) | $T$<br>(°C) | $p$<br>(bar) | $h$<br>(kJ/kg) | $s$<br>(kJ/kg-K) | $e^{ph}$<br>(kJ/kg) | $\dot{m}$<br>(kg/s) |
|-------|----------------|-------------|--------------|----------------|------------------|---------------------|---------------------|
| 29    | 1.0000         | 10.00       | 85.00        | -4807.86       | 8.7622           | 659.37              | 116.70              |
| 30    | 1.0000         | 10.00       | 85.00        | -4807.86       | 8.7622           | 659.37              | 111.19              |
| 31    | 0.0000         | -80.09      | 1.50         | -3430.16       | 3.1074           | 321.57              | 77.27               |
| 32    | 0.0000         | -78.55      | 27.22        | -3424.21       | 3.1154           | 325.11              | 77.27               |
| 33    | 1.0000         | 10.05       | 26.72        | -2888.07       | 5.1816           | 245.23              | 77.27               |
| 34    | 0.9027         | -69.80      | 2.00         | -2989.82       | 5.3069           | 106.12              | 77.27               |
| 35    | 0.0000         | -68.84      | 1.50         | -3159.23       | 2.2712           | 228.73              | 46.25               |
| 36    | 0.0000         | -68.24      | 11.95        | -3156.94       | 2.2741           | 230.17              | 46.25               |
| 37    | 1.0000         | 10.05       | 11.45        | -2613.60       | 4.3452           | 155.99              | 46.25               |
| 38    | 0.9686         | -41.32      | 2.00         | -2683.81       | 4.4210           | 63.18               | 46.25               |
| 39    | 0.0000         | -30.10      | 1.50         | -2831.50       | 1.4327           | 117.73              | 31.97               |
| 40    | 0.0000         | -29.88      | 5.14         | -2830.71       | 1.4336           | 118.27              | 31.97               |
| 41    | 1.0000         | 10.05       | 4.64         | -2366.66       | 3.1199           | 79.54               | 31.97               |
| 42    | 1.0000         | -13.98      | 2.00         | -2397.07       | 3.1493           | 40.38               | 31.97               |
| 43    | 0.0000         | 15.00       | 1.01325      | -15907.22      | 5.0369           | 0.72                | 4265.69             |
| 44    | 0.0000         | 15.05       | 7.50         | -15906.41      | 5.0375           | 1.36                | 4265.69             |
| 45    | 0.0000         | 15.05       | 7.50         | -15906.41      | 5.0375           | 1.36                | 527.28              |
| 46    | 0.0000         | 10.00       | 1.01325      | -15928.18      | 4.9635           | 1.64                | 527.28              |
| 47    | 0.0000         | 15.05       | 7.50         | -15906.41      | 5.0375           | 1.36                | 681.40              |
| 48    | 0.0000         | 10.00       | 1.01325      | -15928.18      | 4.9635           | 1.64                | 681.40              |
| 49    | 0.0000         | 15.05       | 7.50         | -15906.41      | 5.0375           | 1.36                | 1154.16             |
| 50    | 0.0000         | 10.00       | 1.01325      | -15928.18      | 4.9635           | 1.64                | 1154.16             |
| 51    | 0.0000         | 15.05       | 7.50         | -15906.41      | 5.0375           | 1.36                | 1902.85             |
| 52    | 0.0000         | 10.00       | 1.01325      | -15928.18      | 4.9635           | 1.64                | 1902.85             |

Supplementary Table S7

Composition and chemical exergy of the 2ORC-OC states.

| State | Composition (mol%) |                               |                               |                                  |                  | $e^{\text{ch}}$<br>(kJ/kg) |
|-------|--------------------|-------------------------------|-------------------------------|----------------------------------|------------------|----------------------------|
|       | CH <sub>4</sub>    | C <sub>2</sub> H <sub>6</sub> | C <sub>3</sub> H <sub>8</sub> | n-C <sub>4</sub> H <sub>10</sub> | H <sub>2</sub> O |                            |
| 1-29  | 100.00             | 0.00                          | 0.00                          | 0.00                             | 0.00             | 51 480.00                  |
| 30-33 | 0.00               | 94.00                         | 6.00                          | 0.00                             | 0.00             | -                          |
| 34-37 | 0.00               | 46.00                         | 54.00                         | 0.00                             | 0.00             | -                          |
| 38-45 | 0.00               | 0.00                          | 0.00                          | 0.00                             | 100.00           | -                          |

Supplementary Table S8

Composition and chemical exergy of the 3ORC-OC states.

| State | Composition (mol%) |                               |                               |                                  |                  | $e^{\text{ch}}$<br>(kJ/kg) |
|-------|--------------------|-------------------------------|-------------------------------|----------------------------------|------------------|----------------------------|
|       | CH <sub>4</sub>    | C <sub>2</sub> H <sub>6</sub> | C <sub>3</sub> H <sub>8</sub> | n-C <sub>4</sub> H <sub>10</sub> | H <sub>2</sub> O |                            |
| 1-30  | 100.00             | 0.00                          | 0.00                          | 0.00                             | 0.00             | 51 480.00                  |
| 31-34 | 0.00               | 95.00                         | 5.00                          | 0.00                             | 0.00             | -                          |
| 35-38 | 0.00               | 53.00                         | 47.00                         | 0.00                             | 0.00             | -                          |
| 39-42 | 0.00               | 0.00                          | 88.00                         | 12.00                            | 0.00             | -                          |
| 43-52 | 0.00               | 0.00                          | 0.00                          | 0.00                             | 100.00           | -                          |



Supplementary Table S9

Exergy destruction and exergy efficiency by equipment of the 2ORC-OC system.

(1) ORC includes all components associated with the working fluid.

| <b>Equipment</b>     | <b>Input exergy<br/>(kW)</b> | <b>Output<br/>exergy<br/>(kW)</b> | <b>Irreversibilities<br/>(kW)</b> | <b>Exergy<br/>efficiency<br/>(%)</b> |
|----------------------|------------------------------|-----------------------------------|-----------------------------------|--------------------------------------|
| CD-1                 | 7714.13                      | 5582.21                           | 2131.92                           | 72.36                                |
| CD-2                 | 27 496.21                    | 17 139.10                         | 10 357.10                         | 62.33                                |
| CD-3                 | 9013.07                      | 7326.37                           | 1686.70                           | 81.29                                |
| LD                   | 214.08                       | 103.83                            | 110.25                            | 48.50                                |
| MX                   | 45.90                        | 24.12                             | 21.78                             | 52.55                                |
| ORC-1 <sup>(1)</sup> | 27 496.21                    | 7600.41                           | 19 349.54                         | 27.64                                |
| ORC-2 <sup>(1)</sup> | 9013.07                      | 2985.27                           | 5703.39                           | 33.12                                |
| P-1                  | 256.99                       | 58.86                             | 198.12                            | 22.91                                |
| P-2                  | 3841.76                      | 1005.88                           | 2835.89                           | 26.18                                |
| P-3                  | 438.19                       | 262.35                            | 175.84                            | 59.87                                |
| P-4                  | 95.15                        | 60.60                             | 34.55                             | 63.69                                |
| P-5                  | 3450.51                      | 2736.76                           | 713.75                            | 79.31                                |
| R                    | 1581.52                      | 1094.99                           | 486.53                            | 69.24                                |
| T-1                  | 2487.91                      | 1646.22                           | 841.69                            | 66.17                                |
| T-2                  | 10 948.26                    | 8038.60                           | 2909.66                           | 73.42                                |
| T-3                  | 4056.58                      | 3080.42                           | 976.16                            | 75.94                                |
| TH                   | 4416.83                      | 294.84                            | 4122.00                           | 6.68                                 |
| V-1                  | 212.73                       | 0.00                              | 212.73                            | -                                    |
| V-2                  | 9.88                         | 0.00                              | 9.88                              | -                                    |
| VP-1                 | 6453.19                      | 546.26                            | 5906.93                           | 8.46                                 |
| VP-2                 | 3330.38                      | 324.40                            | 3005.98                           | 9.74                                 |

Supplementary Table S10

Exergy destruction and exergy efficiency by equipment of the 3ORC-OC system.

(1) ORC- includes all components associated with the working fluid.

| <b>Equipment</b>     | <b>Input exergy<br/>(kW)</b> | <b>Output<br/>exergy<br/>(kW)</b> | <b>Irreversibilities<br/>(kW)</b> | <b>Exergy<br/>efficiency<br/>(%)</b> |
|----------------------|------------------------------|-----------------------------------|-----------------------------------|--------------------------------------|
| CD-1                 | 5292.74                      | 3396.04                           | 1896.70                           | 64.16                                |
| CD-2                 | 27 724.76                    | 16 648.21                         | 11 076.55                         | 60.05                                |
| CD-3                 | 9086.07                      | 7656.40                           | 1429.67                           | 84.27                                |
| CD-4                 | 3695.79                      | 2472.89                           | 1222.89                           | 66.91                                |
| LD                   | 214.08                       | 103.83                            | 110.25                            | 48.50                                |
| MX                   | 45.90                        | 24.12                             | 21.78                             | 52.55                                |
| ORC-1 <sup>(1)</sup> | 27 724.76                    | 7402.78                           | 19 800.35                         | 26.70                                |
| ORC-2 <sup>(1)</sup> | 9086.07                      | 3141.33                           | 5628.35                           | 34.57                                |
| ORC-3 <sup>(1)</sup> | 3695.79                      | 946.77                            | 2562.22                           | 25.62                                |
| P-1                  | 256.99                       | 58.86                             | 198.12                            | 22.91                                |
| P-2                  | 3793.04                      | 985.09                            | 2807.95                           | 25.97                                |
| P-3                  | 459.55                       | 274.08                            | 185.47                            | 59.64                                |
| P-4                  | 105.90                       | 66.36                             | 39.54                             | 62.66                                |
| P-5                  | 25.24                        | 17.48                             | 7.76                              | 69.24                                |
| P-6                  | 3461.94                      | 2745.83                           | 716.11                            | 79.31                                |
| R                    | 1372.27                      | 902.44                            | 469.82                            | 65.76                                |
| T-1                  | 1510.36                      | 999.39                            | 510.98                            | 66.17                                |
| T-2                  | 10 749.96                    | 7862.33                           | 2887.63                           | 73.14                                |
| T-3                  | 4292.10                      | 3247.23                           | 1044.88                           | 75.66                                |
| T-4                  | 1252.13                      | 972.01                            | 280.12                            | 77.63                                |
| TH                   | 1628.17                      | 144.54                            | 1483.63                           | 8.88                                 |
| V-1                  | 212.73                       | 0.00                              | 212.73                            | -                                    |
| V-2                  | 9.88                         | 0.00                              | 9.88                              | -                                    |
| VP-1                 | 6172.33                      | 521.63                            | 5650.70                           | 8.45                                 |

Supplementary Table S10

Exergy destruction and exergy efficiency by equipment of the 3ORC-OC system.

(1) ORC- includes all components associated with the working fluid.

| <b>Equipment</b> | <b>Input exergy<br/>(kW)</b> | <b>Output<br/>exergy<br/>(kW)</b> | <b>Irreversibilities<br/>(kW)</b> | <b>Exergy<br/>efficiency<br/>(%)</b> |
|------------------|------------------------------|-----------------------------------|-----------------------------------|--------------------------------------|
| VP-2             | 3430.66                      | 316.39                            | 3114.27                           | 9.22                                 |
| VP-3             | 1238.24                      | 186.79                            | 1051.45                           | 15.09                                |

Supplementary Table S11

Economic results of the 2ORC-OC system obtained from the APEA. Centrifugal pump (CP), shell and tube heat exchanger (S&T) and plate heat exchanger (PHE).

| Module  | Equipment         | n. ° | Type / Material | Equip. cost (USD) | Installed cost (USD) | Total capital cost (USD) |
|---------|-------------------|------|-----------------|-------------------|----------------------|--------------------------|
| Propane | Booster pump      | 2    | CP / SS304      | 2 774 000         | 3 494 600            | 84 887 700               |
|         | LNG vaporizer     | 1    | S&T / SS316L    | 350 600           | 748 300              |                          |
|         | Trim heater       | 1    | S&T / Titanium  | 666 700           | 2 572 000            |                          |
|         | Propane pump      | 1    | CP / SS304      | 37 600            | 225 200              |                          |
|         | Propane vaporizer | 3    | PHE / Titanium  | 865 800           | 2 342 500            |                          |
| 2ORC-OC | P-2               | 4    | CP / SS304      | 5 996 800         | 7 614 400            |                          |
|         | P-3               | 2    | CP / SS304      | 367 400           | 686 400              |                          |
|         | P-4               | 2    | CP / SS304      | 93 000            | 257 300              |                          |
|         | CD-1              | 2    | S&T / SS316L    | 325 200           | 2 025 600            |                          |
|         | CD-2              | 2    | S&T / SS316L    | 1 867 000         | 5 848 900            |                          |
|         | CD-3              | 2    | S&T / SS316L    | 2 955 800         | 6 454 300            |                          |
|         | T-1               | 2    | -               | 1 583 800         | 1 718 700            |                          |
|         | T-2               | 2    | -               | 4 112 000         | 4 374 800            |                          |
|         | T-3               | 2    | -               | 2 308 800         | 2 496 000            |                          |
|         | VP-1              | 4    | PHE / Titanium  | 818 800           | 2 550 800            |                          |
|         | VP-2              | 2    | PHE / Titanium  | 425 600           | 1 192 500            |                          |
|         | TH                | 2    | S&T / SS316L    | 1 422 800         | 6 447 700            |                          |

Supplementary Table S12

Economic results of the 3ORC-OC system obtained from the APEA.

| Module  | Equipment         | n. ° | Type / Material | Equip. cost (USD) | Installed cost (USD) | Total capital cost (USD) |
|---------|-------------------|------|-----------------|-------------------|----------------------|--------------------------|
| Propane | Booster pump      | 2    | CP / SS304      | 2 774 000         | 3 494 600            | 102 591 000              |
|         | LNG vaporizer     | 1    | S&T / SS316L    | 350 600           | 748 300              |                          |
|         | Trim heater       | 1    | S&T / Titanium  | 666 700           | 2 572 000            |                          |
|         | Propane pump      | 1    | CP / SS304      | 37 600            | 225 200              |                          |
|         | Propane vaporizer | 3    | PHE / Titanium  | 865 800           | 2 342 500            |                          |
| 3ORC-OC | P-2               | 4    | CP / SS304      | 3 110 800         | 3 834 400            |                          |
|         | P-3               | 2    | CP / SS304      | 373 400           | 692 800              |                          |
|         | P-4               | 2    | CP / SS304      | 96 400            | 262 400              |                          |
|         | P-5               | 2    | CP / SS304      | 24 000            | 181 000              |                          |
|         | CD-1              | 2    | S&T / SS316L    | 203 400           | 1 897 400            |                          |
|         | CD-2              | 2    | S&T / SS316L    | 1 551 200         | 5 522 400            |                          |
|         | CD-3              | 2    | S&T / SS316L    | 6 513 000         | 16 473 800           |                          |
|         | CD-4              | 2    | S&T / SS316L    | 3 087 000         | 5 993 400            |                          |
|         | T-1               | 2    | -               | 575 800           | 887 800              |                          |
|         | T-2               | 2    | -               | 4 068 600         | 4 329 700            |                          |
|         | T-3               | 2    | -               | 2 383 400         | 2 572 900            |                          |
|         | T-4               | 2    | -               | 564 800           | 1 168 200            |                          |
|         | VP-1              | 4    | PHE / Titanium  | 948 000           | 2 719 500            |                          |
|         | VP-2              | 2    | PHE / Titanium  | 370 800           | 1 113 000            |                          |
|         | VP-3              | 2    | PHE / Titanium  | 265 400           | 865 000              |                          |

Supplementary Table S12

Economic results of the 3ORC-OC system obtained from the APEA.

| <b>Module</b> | <b>Equipment</b> | <b>n. °</b> | <b>Type /<br/>Material</b> | <b>Equip.<br/>cost<br/>(USD)</b> | <b>Installed<br/>cost<br/>(USD)</b> | <b>Total<br/>capital cost<br/>(USD)</b> |
|---------------|------------------|-------------|----------------------------|----------------------------------|-------------------------------------|-----------------------------------------|
|               | TH               | 2           | S&T /<br>SS316L            | 930 600                          | 4 805 600                           |                                         |
